# **Withdrawn as Duplicate: Neutron star crust cooling in KS 1731-260: the influence of accretion outburst variability on the crustal temperature evolution**

Laura S. Ootes, Dany Page, Rudy Wijnands and Nathalie Degenaar

The accepted manuscript version of this Letter has been withdrawn as a duplicate. The corrected proof version is available in *Monthly Notices of the Royal Astronomical Society*, 461, 4400–4405 (2016) under a new DOI (<https://doi.org/10.1093/mnras/stw1799>).
